# Supplementary material
Source: Royal Society of Chemistry journal article supplement (doi:10.1039/d5tb02221e)

## Supplementary materials

### **Plasmonic gold-titania-curcumin nanoantennas for synergistic quadruple photodynamic/mild photothermal/radiodynamic/chemo therapy of non-small cell lung cancer**

H. Haghghi, H. Heli, A. Ketabi, R. Dehdari Vais, P. Faghani-Eskandarkolaei, A. Rahi, M. Ziasistani, N. Sattarahmady

**Supplementary material S1:** A summary of some studies of cancer treatment using Au/Ti-based nanoplatforms in combination with photo/radio/sono therapy.

| Nanoformulations                                           | $E_g$ / eV | Cell type         | Therapeutic modality, activation source                                                                                                                                                                                                                    | Key mechanism in cancer treatment                                                                                             | Ref. |
|------------------------------------------------------------|------------|-------------------|------------------------------------------------------------------------------------------------------------------------------------------------------------------------------------------------------------------------------------------------------------|-------------------------------------------------------------------------------------------------------------------------------|------|
| Au-H <sub>2</sub> Ti <sub>3</sub> O <sub>7</sub> nanotubes | 3.37       | A549, LNCap       | PDT/PTT; 532 nm with an energy fluence of 450 J cm <sup>-2</sup> , 635 nm with an energy fluence of 72.5 J cm <sup>-2</sup> and 365 J cm <sup>-2</sup> , 808 nm with an energy fluence of 214.2 J cm <sup>-2</sup>                                         | Au plasmon-assisted ROS generation, photothermal heating, apoptosis                                                           | 1    |
| TiO <sub>2</sub> -Au nanosheets                            | 2.8        | Breast cancer     | SDT by US irradiation at 1.0 MHz, 50% duty cycle, 1.5 W cm <sup>-2</sup>                                                                                                                                                                                   | ROS generation, 4.7-fold increase in apoptosis                                                                                | 2    |
| TiO <sub>2</sub> -Au-PEG-curcumin                          | 2.4        | HeLa              | SDT by US irradiation at 1.0 MHz, 50% duty cycle, 1.5 W cm <sup>-2</sup>                                                                                                                                                                                   | Reducing IC <sub>50</sub> to 38 μg mL <sup>-1</sup> under US irradiation, inhibiting cell migration and 3D spheroid formation | 3    |
| Black TiO <sub>2</sub> NPs                                 | 2.9-3.15   | Bladder cancer    | Phototherapy by 808-nm light irradiation                                                                                                                                                                                                                   | ROS generation                                                                                                                | 4    |
| Au-TiO <sub>2</sub> @doxorubicin                           | -          | MCF-7             | PDT at 150 mW cm <sup>-2</sup>                                                                                                                                                                                                                             | ROS generation, metastasis and apoptosis                                                                                      | 5    |
| TiO <sub>2</sub> -Au <sub>10.5</sub>                       | 2.8        | 4T1 breast cancer | US irradiation at 1.0 MHz, 50% duty cycle, 1.5 W cm <sup>-2</sup>                                                                                                                                                                                          | ROS generation, apoptosis in vitro                                                                                            | 6    |
| Titania-coated 2D gold nanoplates                          | -          | HeLa              | PTT + SDT;<br><br>in vitro: 1 W cm <sup>-2</sup> , 5 min, 1064 nm + 0.5 W cm <sup>-2</sup> , 3 MHz, 4 min on/1 min off, repeated 5 times;<br><br>in vivo: 1 W cm <sup>-2</sup> , 5 min, 1064 nm + 0.5 W cm <sup>-2</sup> , 20 min with 4 min on/1 min off, | PTT/SDT synergistic therapy and ROS generation in vitro; complete tumor elimination in vivo                                   | 7    |

| repeated 5 times                            |     |       |                                                                |                                                                                                                                                            |           |
|---------------------------------------------|-----|-------|----------------------------------------------------------------|------------------------------------------------------------------------------------------------------------------------------------------------------------|-----------|
| TiO <sub>2</sub> -Au-triphenylphosphine NPs | -   | MCF-7 | RDT with 4 Gy X-ray irradiation                                | Mitochondrial targeting, ROS generation, mitochondrial collapse, and apoptosis in vitro; tumor suppression with a single dose of radiation therapy in vivo | 8         |
| PGTCNA                                      | 2.4 | A549  | PDT + mild PTT + RDT + chemotherapy. 808-nm light + 6 Gy X-ray | ROS generation and mitochondrial disruption                                                                                                                | This work |

Sonodynamic therapy: SDT

Ultrasound: US

#### References:

- [1] M. I. Al-Shemri, M. Aliannezhadi, R. A. Ghaleb and M. J. Al-Awady, *Sci. Rep.*, 2024, 14, 25998.
- [2] L. Huang, L. Wei, D. Li, W. Zhang and L. Liu, *Int. J. Nanomed.*, 2025, 20, 6121-6131.
- [3] H. Haghghi, N. Zahraie, M. Haghani, H. Heli and N. Sattarahmady, *Ultrason. Sonochem.*, 2024, 102, 106747.
- [4] W. Ni, M. Li, J. Cui, Z. Xing, Z. Li, X. Wu, E. Song, M. Gong and W. Zhou, *Mater. Sci. Eng. C*, 2017, 81, 252-260.
- [5] M. Waseem Akram, Fazal Raziq, Muhammad Fakhar-e-Alam, Muhammad Hammad Aziz, K.S. Alimgeer, M. Atif, M. Amir, Atif Hanif, W. Aslam Farooq, Tailoring of Au-TiO<sub>2</sub> nanoparticles conjugated with doxorubicin for their synergistic response and photodynamic therapy applications, *Journal of Photochemistry and Photobiology A: Chemistry*, 384, 2019, 112040,1010-6030, <https://doi.org/10.1016/j.jphotochem.2019.112040>.
- [6] Huang, L., Wei, L., Li, D., Zhang, W., & Liu, L. (2025). Enhanced Sonodynamic Therapy via Au Nanoclusters Deposited on TiO<sub>2</sub> Nanosheets. *International journal of nanomedicine*, 20, 6121–6131. <https://doi.org/10.2147/IJN.S516314>
- [7] 28 of Dr.Kiani table
- [8] Li, N., Yu, L., Wang, J., Gao, X., Chen, Y., Pan, W., & Tang, B. (2018). A mitochondria-targeted nanoradiosensitizer activating reactive oxygen species burst for enhanced radiation therapy. *Chemical science*, 9(12), 3159–3164. <https://doi.org/10.1039/c7sc04458e>

**Supplementary material S2:** Treatment groups of NSCLC tumorspheres were categorized into the following groups:

L-/R-/PGTCNA -: Untreated tumorspheres (control)

L-/R-/PGTCNA+: Tumorspheres treated with PGTCNA at a concentration of  $100 \mu\text{g mL}^{-1}$  (without any radiation)

L+/R-/PGTCNA-: Tumorspheres exposed to laser light radiation (without PGTCNA treatment or X-ray radiation)

L-/R+/PGTCNA-: Tumorspheres exposed to X-ray radiation (without PGTCNA treatment or laser light radiation)

L+/R+/PGTCNA-: Tumorspheres exposed to laser light radiation and then X-ray radiation with one hour interval (without PGTCNA treatment)

L+/R-/PGTCNA+: Tumorspheres treated with PGTCNA at a concentration of  $100 \mu\text{g mL}^{-1}$  and then exposed to laser light radiation at a one-hour interval (without X-ray radiation)

L-/R+/PGTCNA+: Tumorspheres treated with PGTCNA at a concentration of  $100 \mu\text{g mL}^{-1}$  and then exposed to X-ray radiation at a one-hour interval (without laser light radiation)

L+/R+/PGTCNA+: Tumorspheres treated with PGTCNA at a concentration of  $100 \mu\text{g mL}^{-1}$  and then exposed to laser light radiation at a one-hour interval, and ultimately exposed to X-ray radiation at a one-hour interval

**Supplementary material S3:** Temperature changes of DI-water, curcumin, TiO<sub>2</sub>, and Au-TiO<sub>2</sub> dispersion, and PGTCNA dispersion (100 μg mL<sup>-1</sup>) upon the laser light radiation followed by radiation off and cooling.

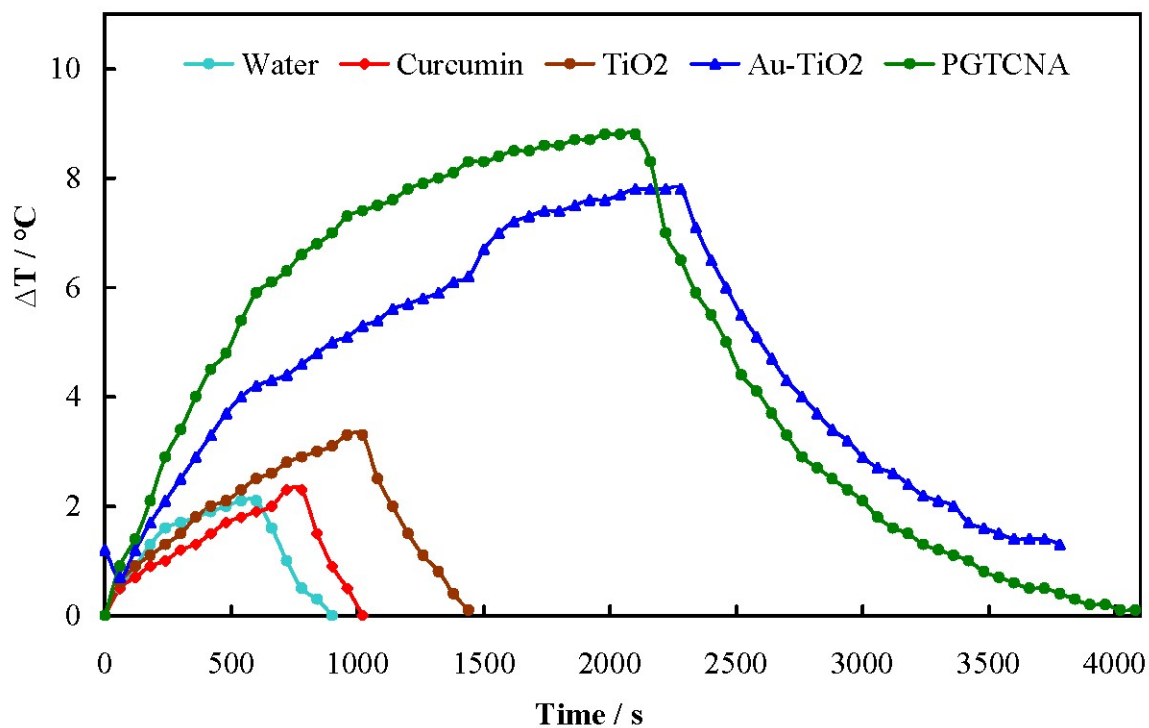

**Supplementary material S4:** Cytotoxicity of curcumin, Au-TiO<sub>2</sub>, and PGTCNA against cancer lung cell lines (A549). \*\* indicates very significant differences (n=3, P-value < 0.01). \*\*\* indicates high significant differences (n=3, P-value < 0.001), for biological replicates.

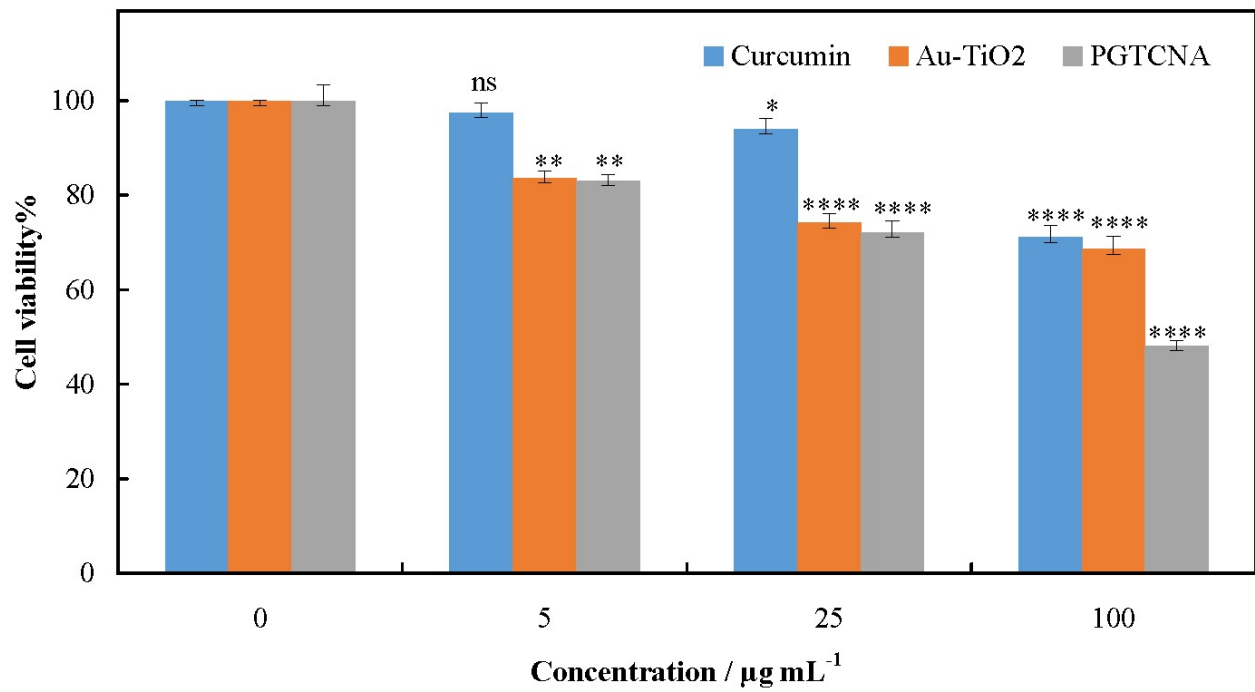

**Supplementary material S5:** A summary of applications of 808-nm laser/RT in preclinical and translational studies on NSCLC treatment.

| Formulation                                                                                              | Laser parameters                            | X-ray dose       | Cell type      | Key outcomes                                                                                                          | Ref.       |
|----------------------------------------------------------------------------------------------------------|---------------------------------------------|------------------|----------------|-----------------------------------------------------------------------------------------------------------------------|------------|
| Au@SiO <sub>2</sub> nanomaterials                                                                        | 808 nm, 1.0 W cm <sup>-2</sup> , 10 min, CW | -                | MCF-7          | Strong anti-cancer effects, mild PTT by an HSP-70 inhibitor operated at a low temperature (~45 °C)                    | 1          |
| A programmed death-ligand 1 antibody@lipid gel                                                           | 808 nm, 1.0 W cm <sup>-2</sup> , 10 min, CW | -                | B16F10         | Controlled mild hyperthermia and triggered immunotherapy, to convert cold tumors into immunologically active hot ones | 2          |
| Mesoporous Fe <sub>3</sub> O <sub>4</sub> nanoparticles loaded with perfluoropentane and glucose oxidase | 808 nm, 1.0 W cm <sup>-2</sup> , 10 min, CW | -                | 4T1            | Temperature increment to ~44 °C, synergistic effects of mild hyperthermia and chemotherapy                            | 3          |
| -                                                                                                        | -                                           | 18 Gy × 3 (SBRT) | Clinical NSCLC | 100% local tumor control                                                                                              | 4          |
| -                                                                                                        | -                                           | 6 Gy/fraction    | A549 (NSCLC)   | Amplifying radiation-induced DNA damage and apoptosis with delay in its repair                                        | 5          |
| PGTCNA                                                                                                   | 808 nm, 1.0 W cm <sup>-2</sup> , 10 min, CW | 6 Gy             | A549 (NSCLC)   | Combined mild photothermal/photodynamic effects with X-rays to enhance ROS generation                                 | This study |

Abbreviations:

CW, continuous wave; SBRT, stereotactic body radiotherapy

References:

- [1] C. You, Y. Li, Y. Dong, L. Ning, Y. Zhang, L. Yao and F. Wang, *ACS Biomater. Sci. Eng.*, 2020, 6, 1535–1542.
- [2] L. Huang, Y. Li, Y. Du, Y. Zhang, X. Wang, Y. Ding, X. Yang, F. Meng, J. Tu, L. Luo and C. Sun, *Nat. Commun.*, 2019, 10, 4871.
- [3] L. Zhang, Y. Li, W. Che, D. Zhu, G. Li, Z. Xie, X. Liu, L. Song, J. Liu and Y. Wang, *ACS Appl. Mater. Interfaces*, 2020, 12, 33683–33690.
- [4] J. Roesch, N. Andratschke and M. Guckenberger, *Transl. Lung Cancer Res.*, 2014, 3, 212–224.
- [5] Y. Chen, Y. Wang, L. Zhao, P. Wang, J. Sun, R. Bao, C. Li and N. Liu, *Cancer Biol. Med.*, 2018, 15, 39–51.

**Supplementary material S6:** Absorbance spectra for NBT upon radiation by laser light in the absence or presence of PGTCNA.

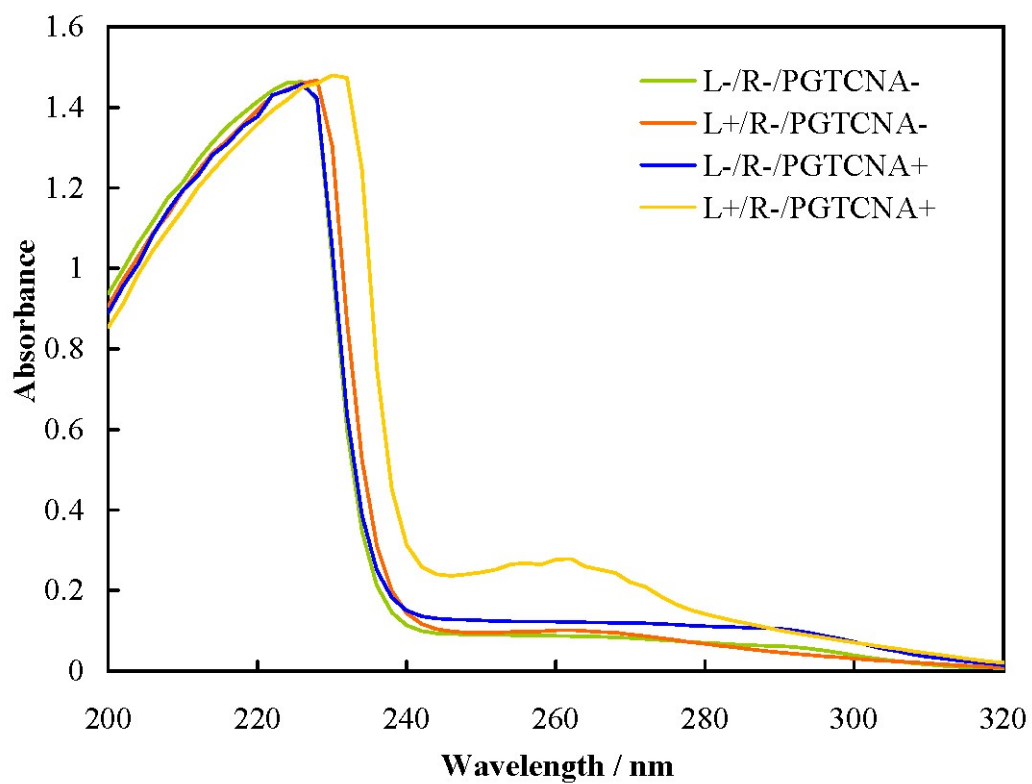

**Supplementary material S7:** Absorbance spectra for MB upon radiation by laser light in the absence or presence of PGTCNA.

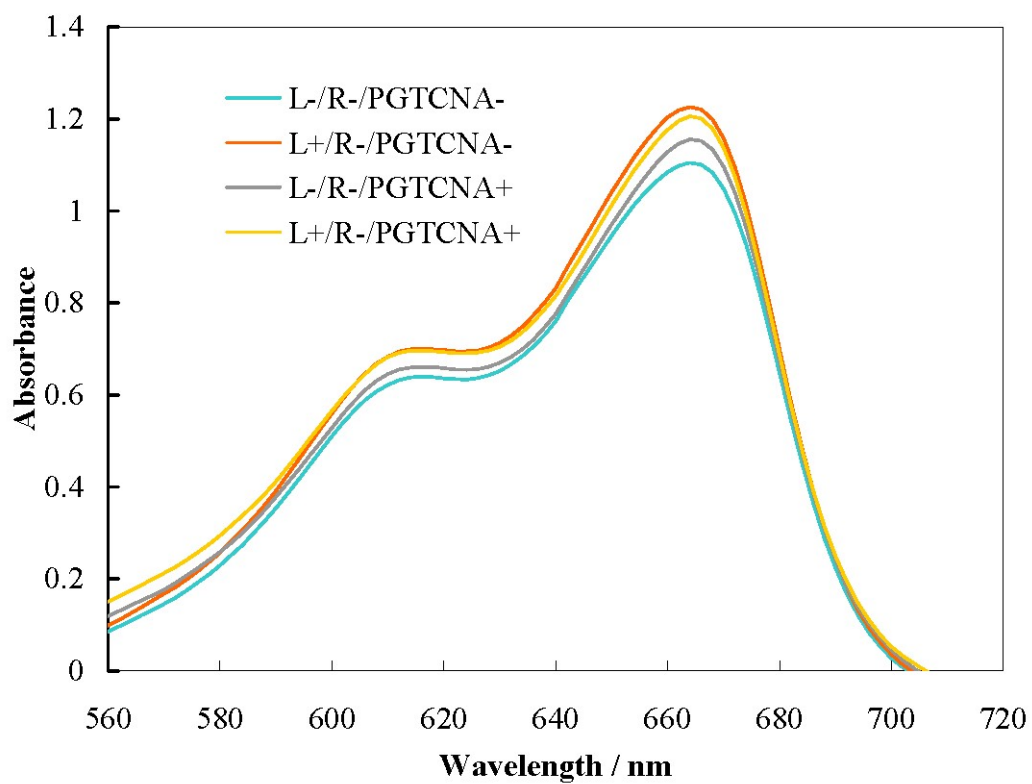

**Supplementary material S8:**  $^1\text{O}_2$  generation by PGTCNA upon the laser light radiation in different treatment groups, that evaluated by measuring the 420 nm absorbance as DPBF degradation ratios, for L-/R-/PGTCNA-, L+/R-/PGTCNA-, L-/R-/PGTCNA+, L+/R-/PGTCNA+ groups, and after the addition of sodium azide as singlet oxygen scavenger as L+/R-/PGTCNA+/scavenger group.

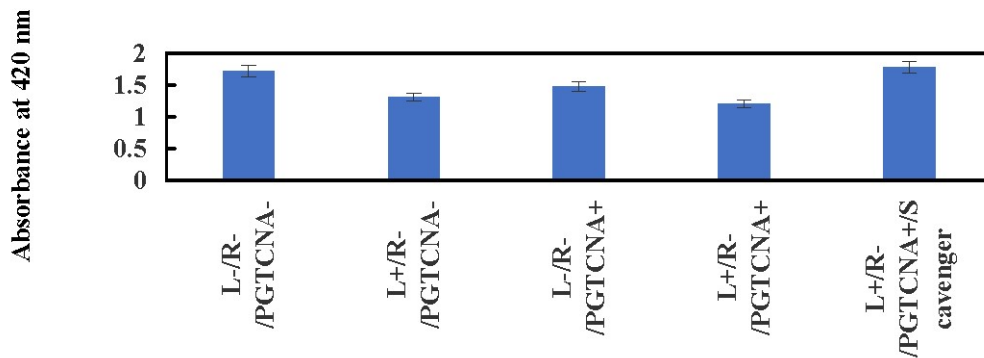

Supplement: d5tb02221e1.pdf [file d5tb02221e1.pdf]
